# Supplementary material for: Sequential effects of two cations on the fluorescence emission of a coordination polymer with Zn 4 O core in node
Source: Royal Society of Chemistry journal article supplement (doi:10.1039/d4ra06309k), 2024-01-01
Supplement: d4ra06309k1.pdf [file d4ra06309k1.pdf]

Supporting Information

Sequential Effects of Two Cations on the Fluorescence Emission of a Coordination Polymer with Zn<sub>4</sub>O

Core in Node

Jagajiban Sendh, and Jubaraj B. Baruah\*

Department of Chemistry, Indian Institute of Technology Guwahati, Guwahati-781039, Assam, India.

| Figure/table | Description                                                                                                                                                                                                                                                                                                                                                                                                                                                                                                                                                                                                                          |
|--------------|--------------------------------------------------------------------------------------------------------------------------------------------------------------------------------------------------------------------------------------------------------------------------------------------------------------------------------------------------------------------------------------------------------------------------------------------------------------------------------------------------------------------------------------------------------------------------------------------------------------------------------------|
| Figure S1    | Illustrations of some nodes of zinc carboxylate coordination polymers                                                                                                                                                                                                                                                                                                                                                                                                                                                                                                                                                                |
| Figure S2    | (a) The powder X-ray diffraction pattern of the zinc-coordination polymer (blue): Experimental; (red): simulated from the crystallographic information file; (b) The FT-IR spectra of the (i) H <sub>2</sub> NAPHISO and (ii) the zinc coordination polymer Zn <sub>4</sub> O-CP.                                                                                                                                                                                                                                                                                                                                                    |
| Figure S3    | Energy dispersive X-ray (EDX) spectra of powder samples of Zn <sub>4</sub> O-CP                                                                                                                                                                                                                                                                                                                                                                                                                                                                                                                                                      |
| Figure S4    | EDX elemental mapping of Zn <sub>4</sub> O-CP.                                                                                                                                                                                                                                                                                                                                                                                                                                                                                                                                                                                       |
| Figure S5    | (i) The optical microscopic images of crystals and (ii) SEM images of the powdered samples of the Zn <sub>4</sub> O-CP.                                                                                                                                                                                                                                                                                                                                                                                                                                                                                                              |
| Figure S6    | Thermogravimetry of the Zn <sub>4</sub> O-CP under nitrogen atmosphere at a heating rate of 10 °C/min.                                                                                                                                                                                                                                                                                                                                                                                                                                                                                                                               |
| Figure S7    | Nitrogen gas adsorption and desorption isotherm of Zn <sub>4</sub> O-CP performed at -196 °C.                                                                                                                                                                                                                                                                                                                                                                                                                                                                                                                                        |
| Figure S8    | Concentration-dependent UV-visible spectra of H <sub>2</sub> NAPHISO ( $\lambda_{max} = 335$ nm) (3 mL, 1 mM of H <sub>2</sub> NAPHISO in DMF by adding 10 $\mu$ L in aliquots 1 mM of the same).                                                                                                                                                                                                                                                                                                                                                                                                                                    |
| Figure S9    | Fluorescence emission of H <sub>2</sub> NAPHISO (1 mM in DMF, 3 mL, $\lambda_{ex} = 335$ nm, $\lambda_{em} = 452$ nm) with zinc(II) acetate (300 $\mu$ L 10 mM in water) recorded after one minute for nine times.                                                                                                                                                                                                                                                                                                                                                                                                                   |
| Figure S10   | Plots of fluorescence intensity v/s concentration of the solution of the H <sub>2</sub> NAPHISO (1 mM in DMF, 3 mL) with aqueous Zn <sup>2+</sup> ions (10 mM) and Cd <sup>2+</sup> ions (10 mM) at different concentrations.                                                                                                                                                                                                                                                                                                                                                                                                        |
| Figure S11   | Fluorescence emission spectra of H <sub>2</sub> NAPHISO (1mM solution in DMF, 3000 $\mu$ L taken in cuvette) ( $\lambda_{ex} = 333$ nm, $\lambda_{em} = 452$ nm) with aqueous Zn <sup>2+</sup> (10mM, 400 $\mu$ L) in the presence of (a) Mg <sup>2+</sup> (b) Al <sup>3+</sup> (c) Na <sup>+</sup> (d) K <sup>+</sup> (e) Li <sup>+</sup> (f) Cs <sup>+</sup> (g) Hg <sup>2+</sup> (h) Mn <sup>2+</sup> (i) Fe <sup>2+</sup> (j) Ni <sup>2+</sup> (k) Sn <sup>2+</sup> (l) Pb <sup>2+</sup> , (m) Ag <sup>+</sup> ions. (in each case the to a ligand solution the specific metal ions was added followed by solution of zinc ions) |
| Figure S12   | Change in the fluorescence emission of (a) H <sub>2</sub> NAPHISO as a function of concentration of Zn <sup>2+</sup> ion and (b) Change in I/I <sub>0</sub> of Zn <sub>4</sub> O-CP with increasing amounts of Fe <sup>2+</sup> ions                                                                                                                                                                                                                                                                                                                                                                                                 |
| Figure S13   | Bar graph of relative changes in the fluorescence emission intensity of H <sub>2</sub> NAPHISO with different ions with respect to Zn <sup>2+</sup> ion.                                                                                                                                                                                                                                                                                                                                                                                                                                                                             |
| Figure S14   | Competitive fluorescence emission spectra of Zn <sub>4</sub> O-CP (3mL, 4 mg in 10 mL of DMF with aqueous Fe <sup>2+</sup> (10mM, 400 $\mu$ L) in the presence of (a) Li <sup>+</sup> (b) Al <sup>3+</sup> (c) Cd <sup>2+</sup> (d) Hg <sup>2+</sup> (e) Na <sup>+</sup> ions. Change in the fluorescence emission of H <sub>2</sub> NAPHISO as a function of Zn <sup>2+</sup> ion concentration.                                                                                                                                                                                                                                    |
| Figure S15   | (a) The absorption and emission spectra of Zn <sub>4</sub> O-CP in DMF and (b) Comparison of experimental PXRD patterns of the Zn <sub>4</sub> O-CP and PXRD of the sample after treatment with Fe <sup>2+</sup> .                                                                                                                                                                                                                                                                                                                                                                                                                   |
| Figure S16   | FT-IR spectra of H <sub>2</sub> NAPHISO and precipitate obtained after treating it with zinc acetate hexahydrate for 2 hrs in DMF at room temperature.                                                                                                                                                                                                                                                                                                                                                                                                                                                                               |
| Figure S17   | Life-time decay profile of (i) Zn <sub>4</sub> O-CP (4 mg 4 mg in 3 mL DMF dispersed by sonication), (ii) by adding Fe <sup>2+</sup> (200 $\mu$ L from 10 mM solution in DMF), and (iii) H <sub>2</sub> NAPHISO (1mM in 3 mL DMF) with 300 $\mu$ L Zn <sup>2+</sup> (10 mM stock solution in DMF).                                                                                                                                                                                                                                                                                                                                   |
| Figure S18   | The change in emission spectra of H <sub>2</sub> NAPHISO (1 mM in DMF, 2.5 mL) incrementally diluted with water                                                                                                                                                                                                                                                                                                                                                                                                                                                                                                                      |
| Table S1     | Crystals parameters of the Zn <sub>4</sub> O-CP                                                                                                                                                                                                                                                                                                                                                                                                                                                                                                                                                                                      |
| Table S2     | Life-time decay data                                                                                                                                                                                                                                                                                                                                                                                                                                                                                                                                                                                                                 |
| Table S3     | A comparison of the detection limits of Fe <sup>2+</sup> ions by various substrates reported recently                                                                                                                                                                                                                                                                                                                                                                                                                                                                                                                                |

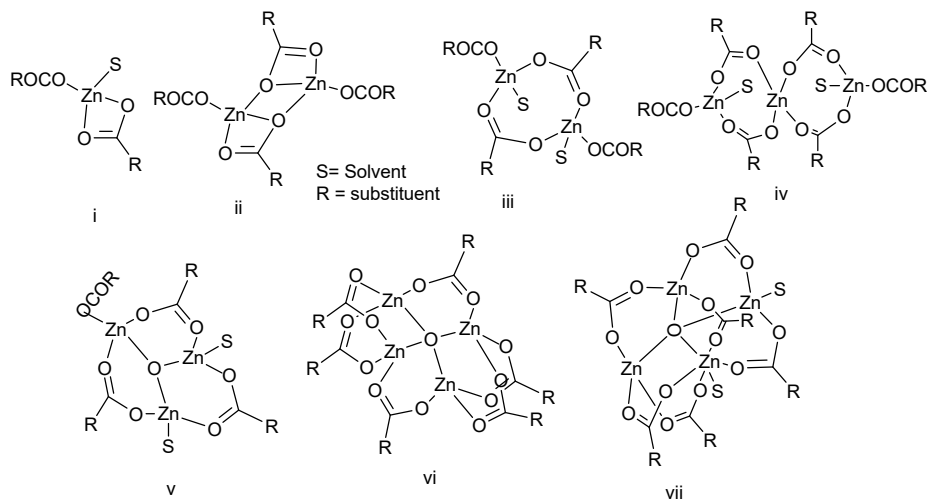

Figure S1: Illustrations of some nodes of zinc carboxylate coordination polymers

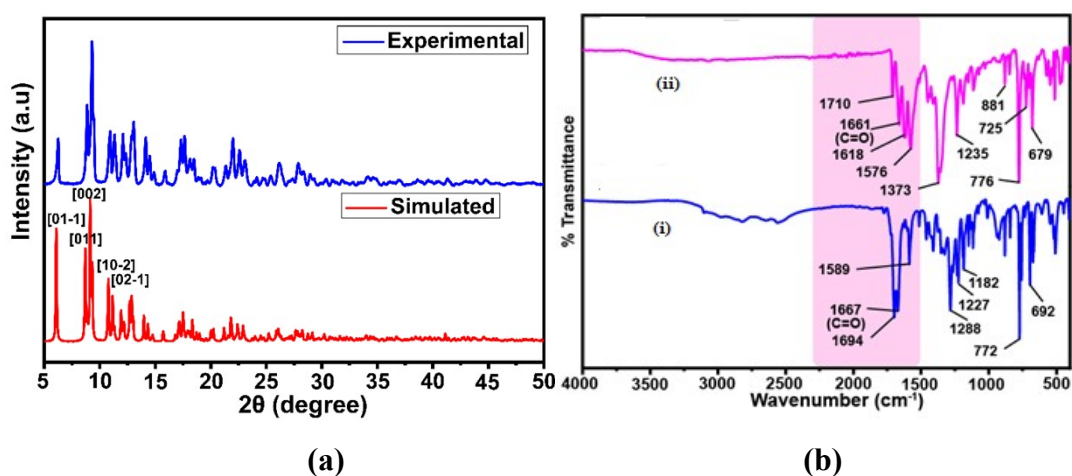

Figure S2: (a) The powder X-ray diffraction pattern of the zinc-coordination polymer (blue): Experimental; (red): simulated from the crystallographic information file; (b) The FT-IR spectra of the (i) **H<sub>2</sub>NAPHISO** and (ii) the zinc coordination polymer **Zn<sub>4</sub>O-CP**.

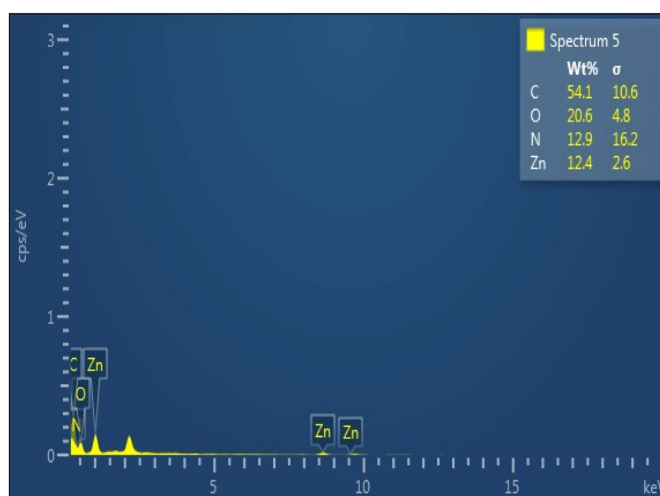

Figure S3: Energy dispersive X-ray (EDX) spectra of powder samples of **Zn<sub>4</sub>O-CP**.

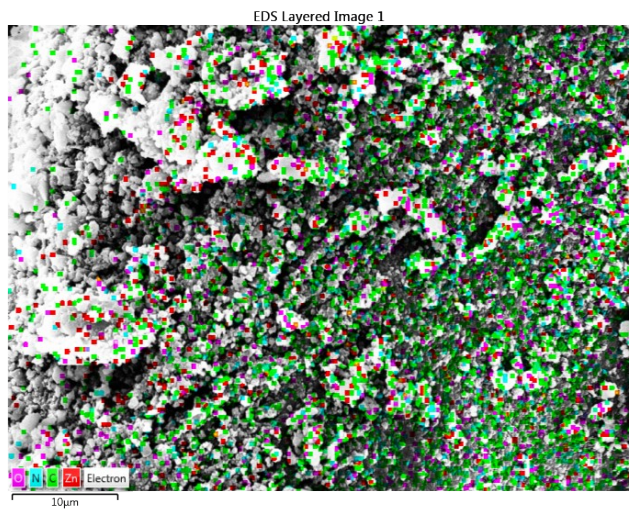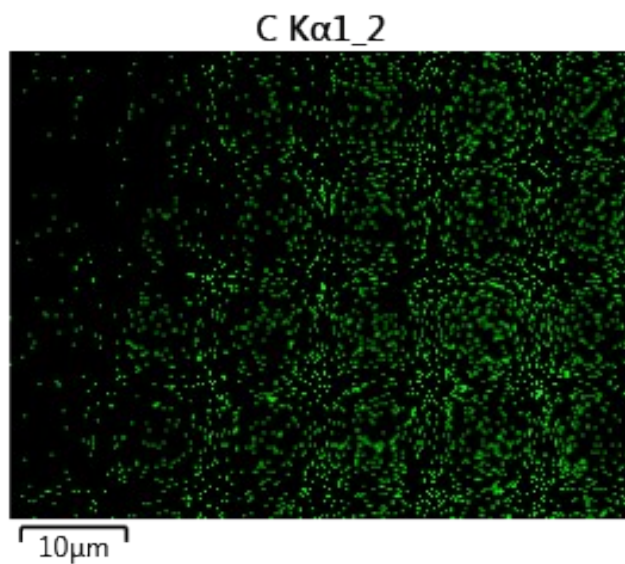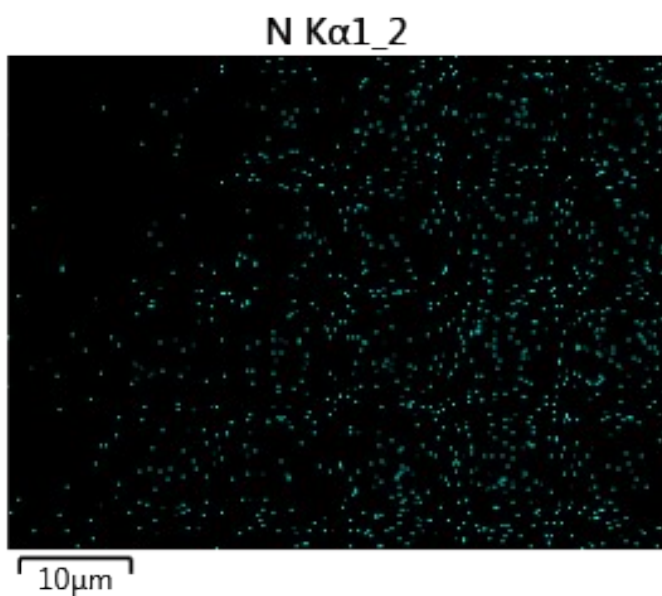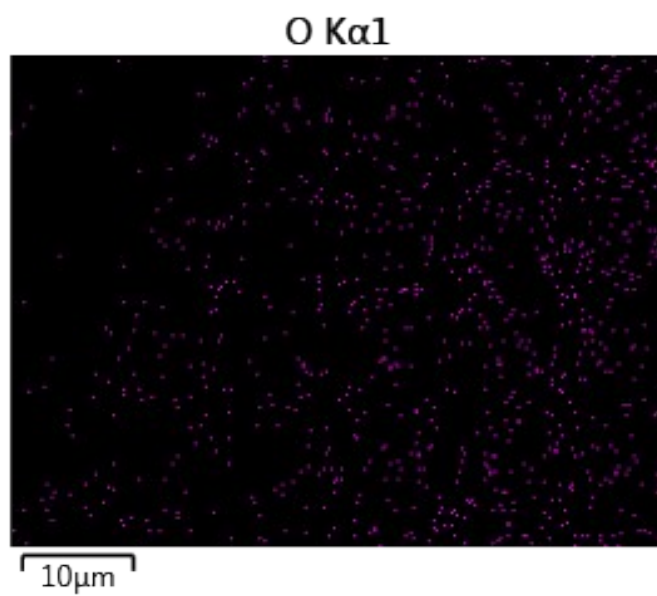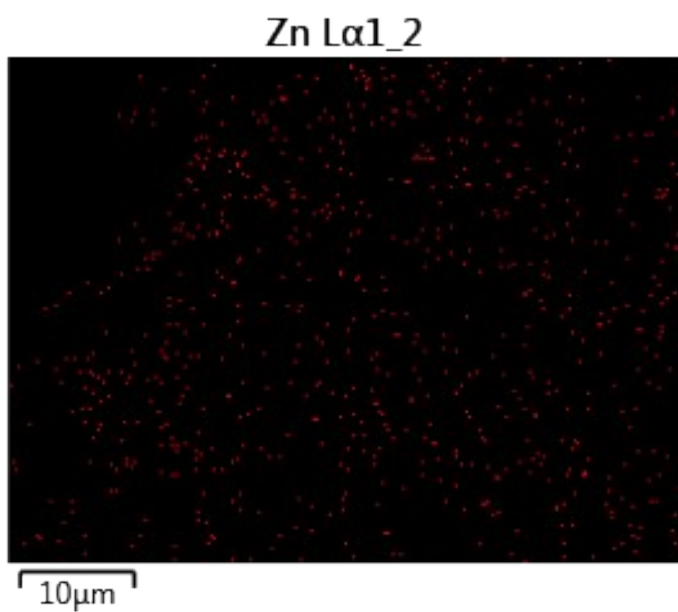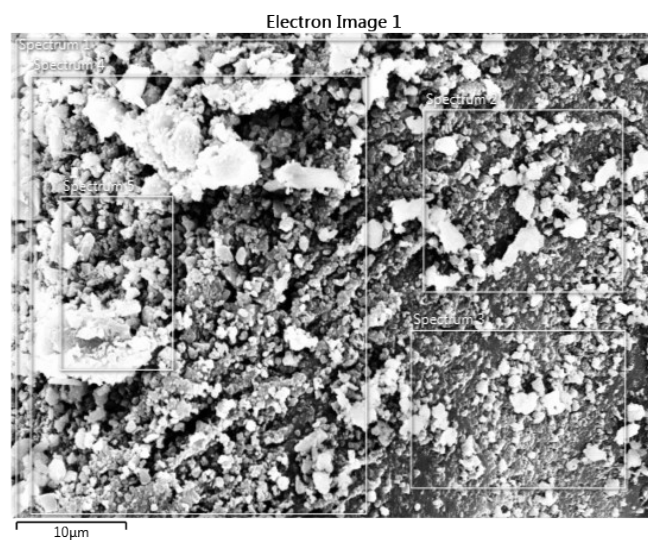

Figure S4: EDX elemental mapping of  $Zn_4O-CP$

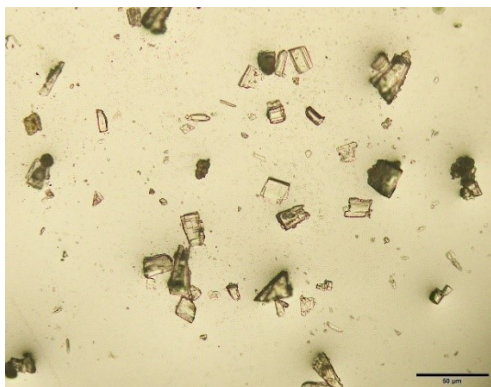

(i)

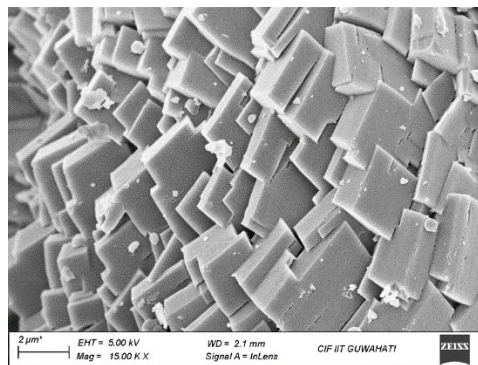

(ii)

Figure S5: (i) The optical microscopic images of the crystals and (ii) SEM images of the powdered samples of the  $\text{Zn}_4\text{O-CP}$ .

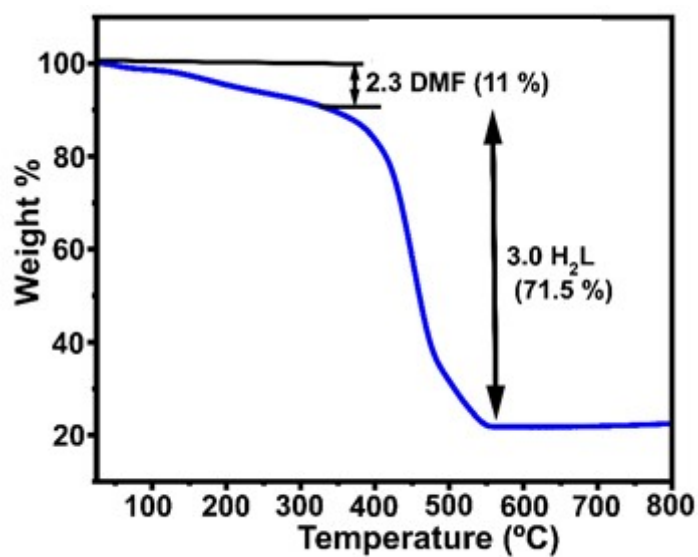

Figure S6: Thermogravimetry of the  $\text{Zn}_4\text{O-CP}$  under nitrogen atmosphere at a heating rate of  $10\text{ }^\circ\text{C}/\text{min}$ .

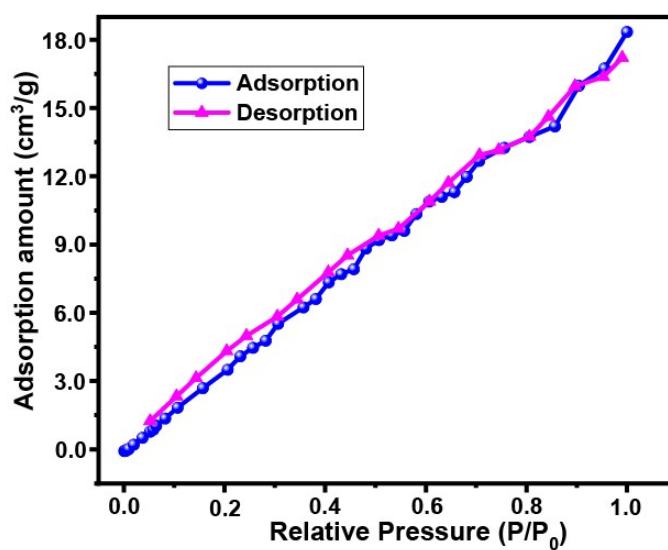

Figure S7: Nitrogen gas adsorption and desorption isotherm of  $\text{Zn}_4\text{O-CP}$  performed at  $-196\text{ }^\circ\text{C}$ .

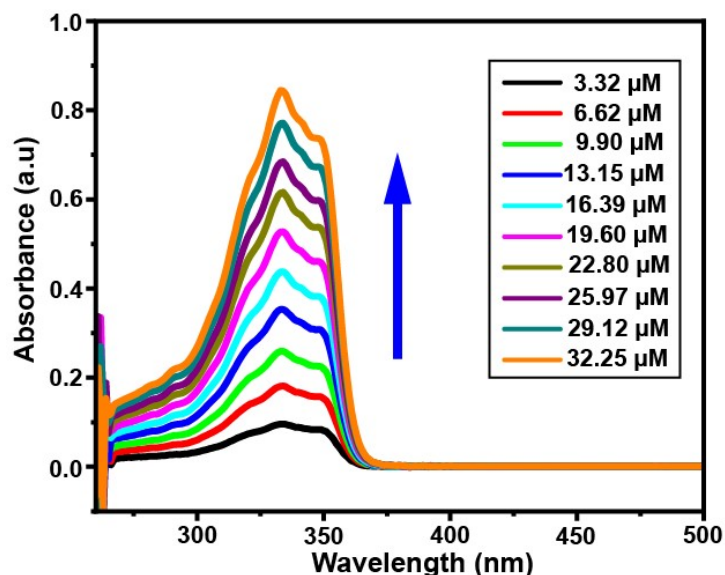

Figure S8: Concentration-dependent UV-visible spectra of  $\text{H}_2\text{NAPHISO}$  ( $\lambda_{\text{max}} = 335 \text{ nm}$ ) (3 mL, 1 mM of  $\text{H}_2\text{NAPHISO}$  in DMF by adding 10  $\mu\text{L}$  in aliquots 1 mM of the same).

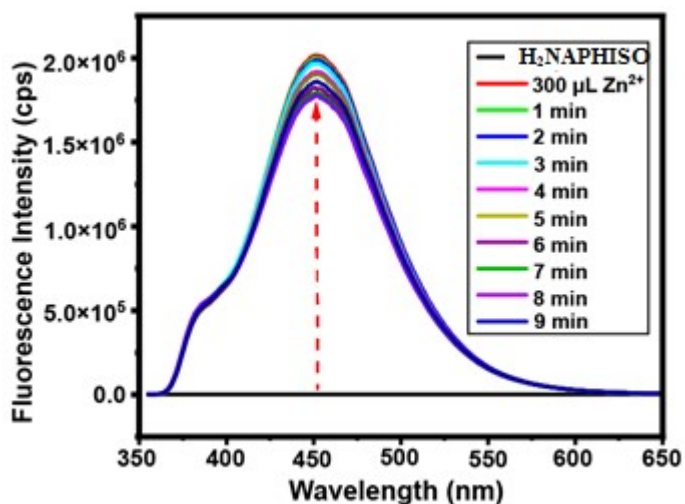

Figure S9: Fluorescence emission of  $\text{H}_2\text{NAPHISO}$  (1 mM in DMF, 3 mL,  $\lambda_{\text{ex}} = 335 \text{ nm}$ ,  $\lambda_{\text{em}} = 452 \text{ nm}$ ) with zinc(II) acetate (300  $\mu\text{L}$  10 mM in water) recorded after one minute for nine times.

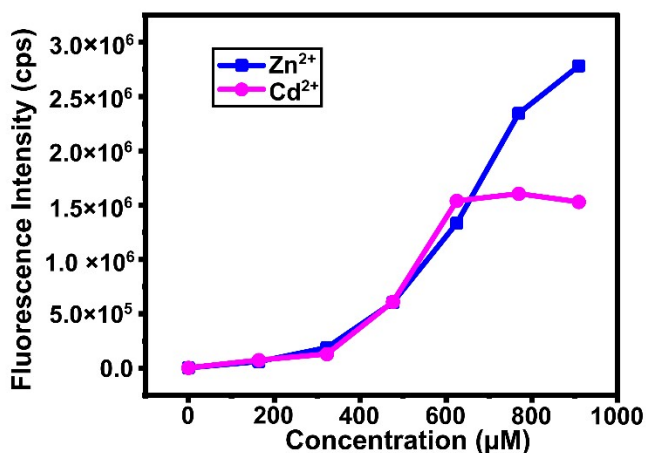

Figure S10: Plots of fluorescence intensity v/s concentration of the solution of the  $\text{H}_2\text{NAPHISO}$  (1 mM in DMF, 3 mL) with aqueous  $\text{Zn}^{2+}$  ions (10 mM) and  $\text{Cd}^{2+}$  ions (10 mM) at different concentrations.

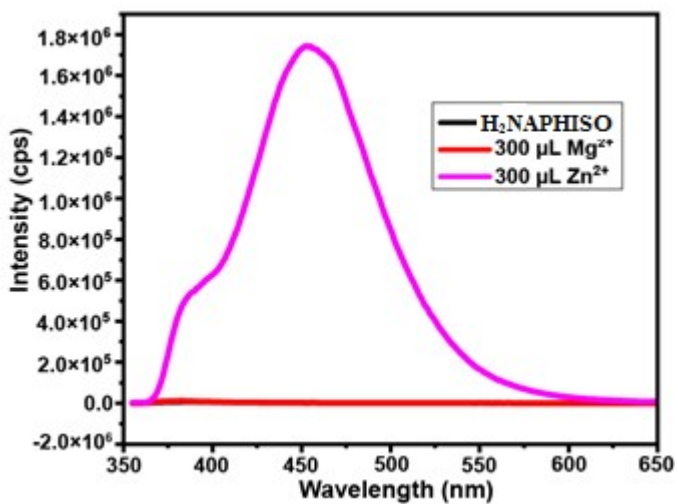

(a)

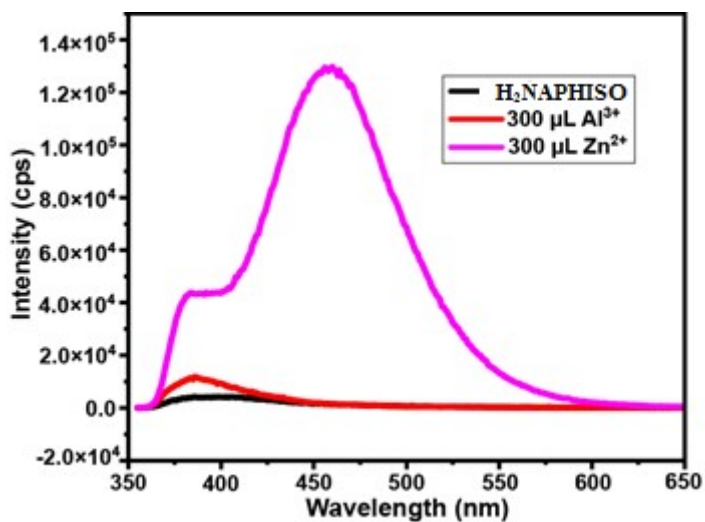

(b)

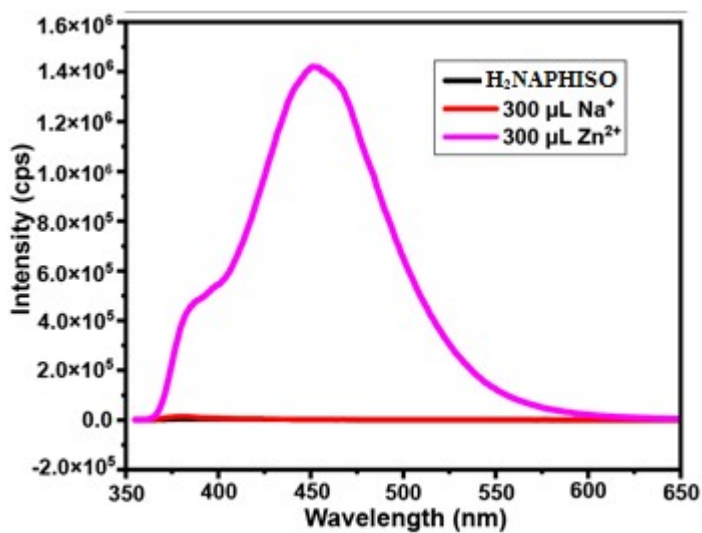

(c)

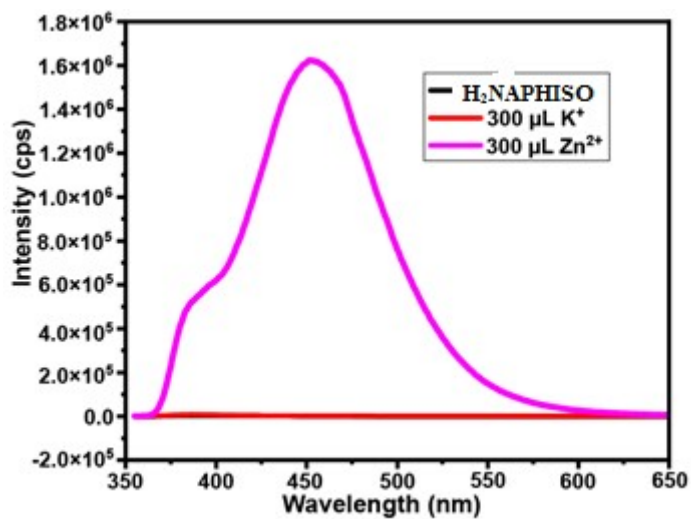

(d)

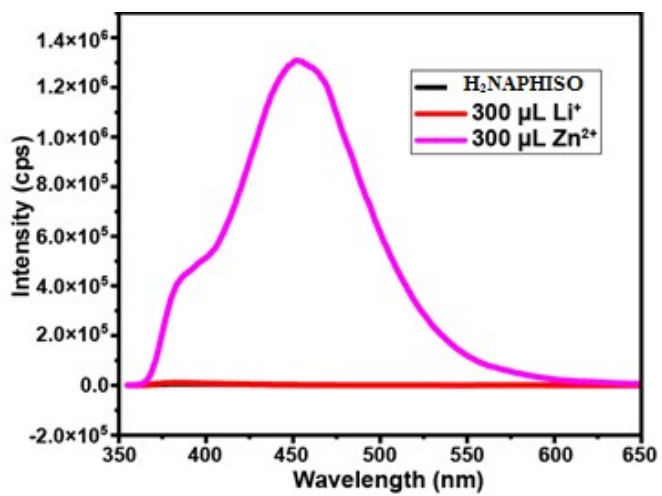

(e)

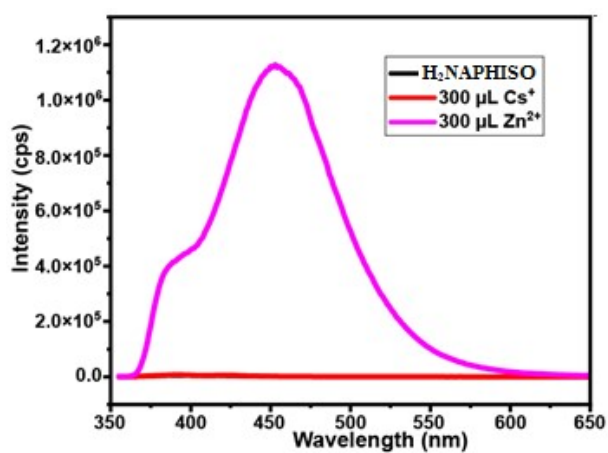

(f)

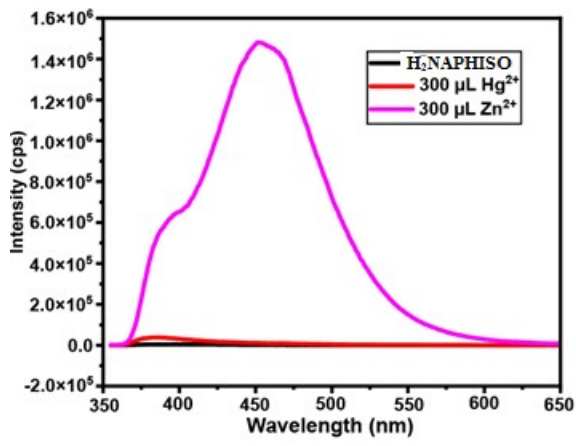

(g)

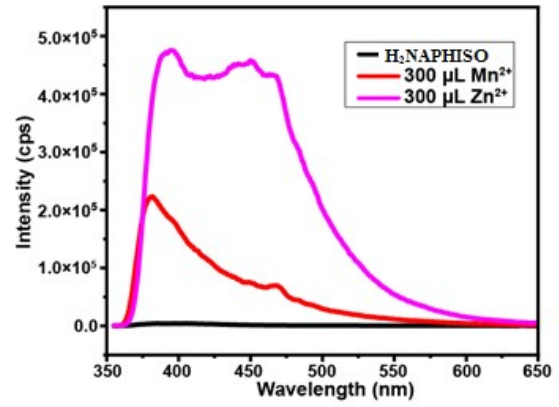

(h)

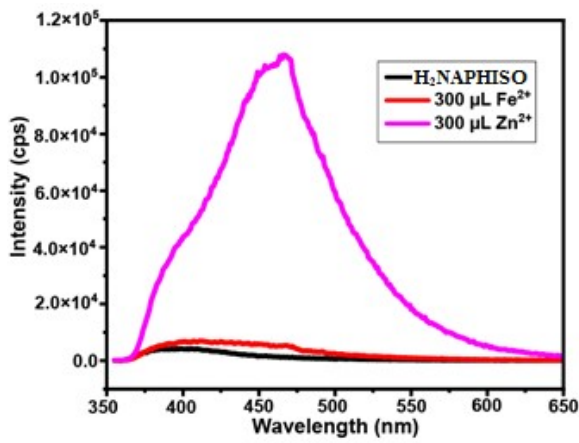

(i)

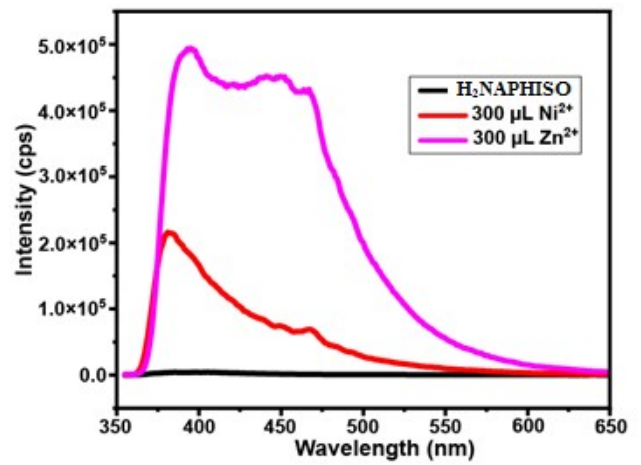

(j)

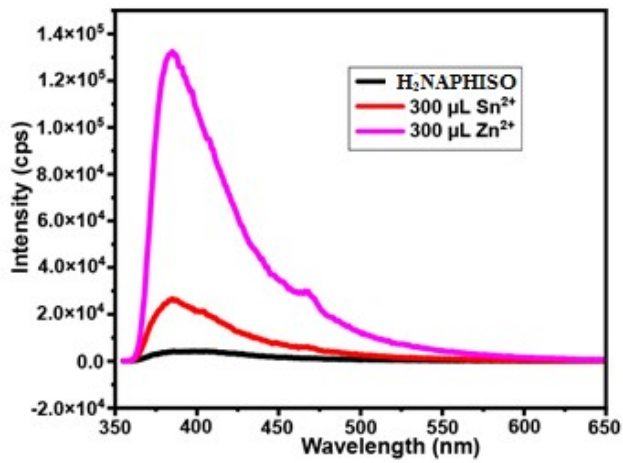

(k)

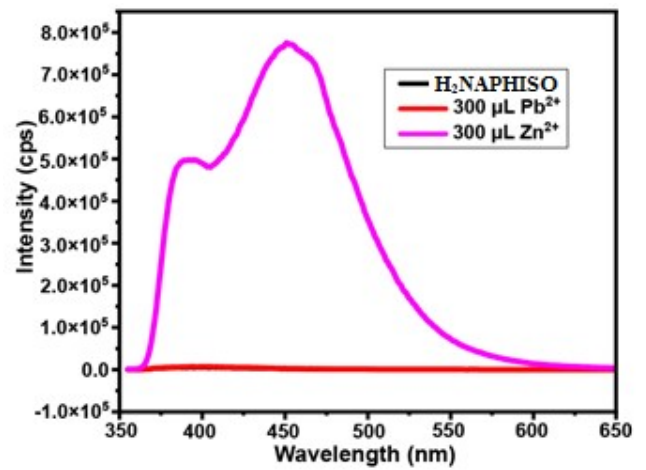

(l)

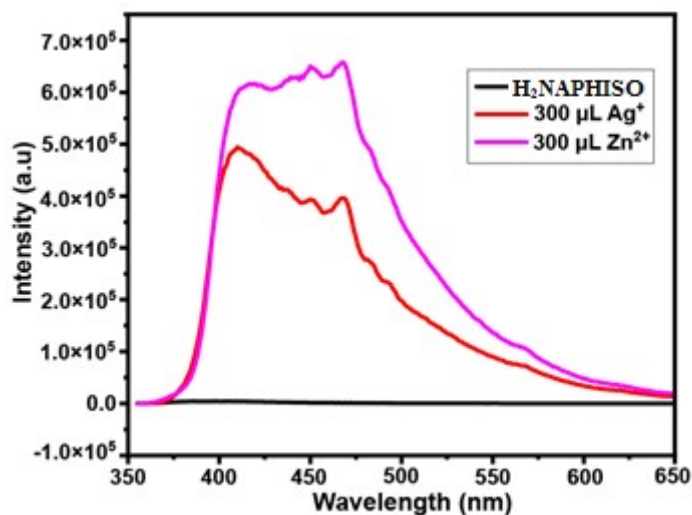

(m)

Figure S11: Fluorescence emission spectra of **H<sub>2</sub>NAPHISO** (1mM solution in DMF, 3000 μL taken in cuvette) ( $\lambda_{\text{ex}} = 333 \text{ nm}$ ,  $\lambda_{\text{em}} = 452 \text{ nm}$ ) with aqueous Zn<sup>2+</sup> (10mM, 400 μL) in the presence of (a) Mg<sup>2+</sup> (b) Al<sup>3+</sup> (c) Na<sup>+</sup> (d) K<sup>+</sup> (e) Li<sup>+</sup>, (f) Cs<sup>+</sup>, (g) Hg<sup>2+</sup>, (h) Mn<sup>2+</sup>, (i) Fe<sup>2+</sup>, (j) Ni<sup>2+</sup>, (k) Sn<sup>2+</sup>, (l) Pb<sup>2+</sup>, (m) Ag<sup>+</sup> ions (in each case the to a ligand solution the specific metal ion was added followed by solution of zinc ions)

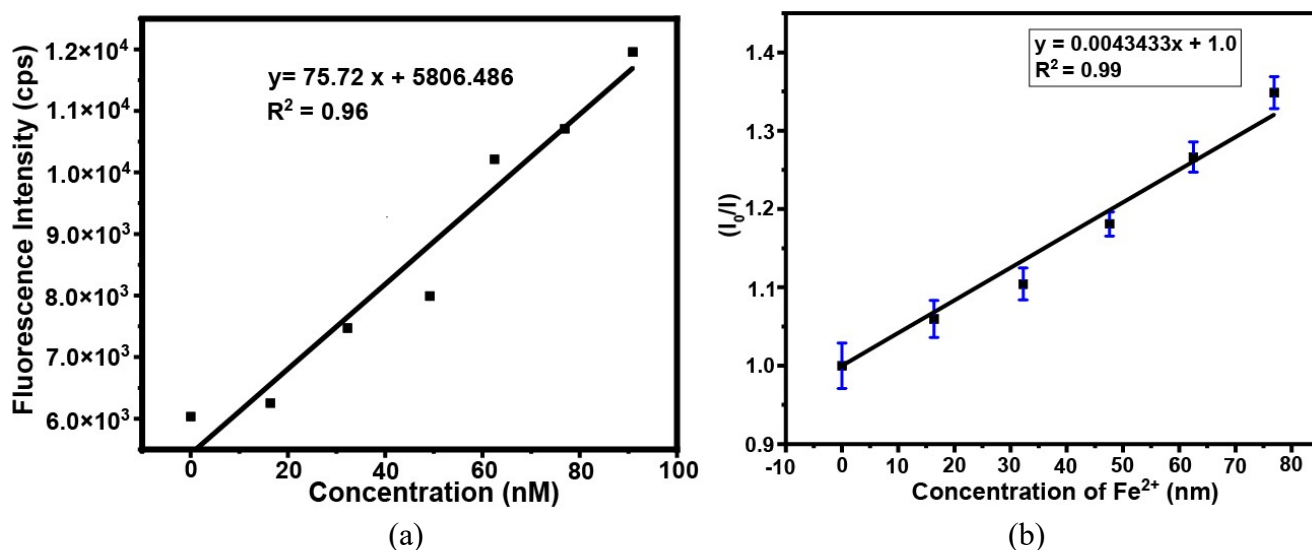

Figure S12 : Change in the fluorescence emission of (a) **H<sub>2</sub>NAPHISO** as a function of concentration of Zn<sup>2+</sup> ion and (b) Change in  $I/I_0$  of **Zn<sub>4</sub>O-CP** with increasing amounts of Fe<sup>2+</sup> ions.



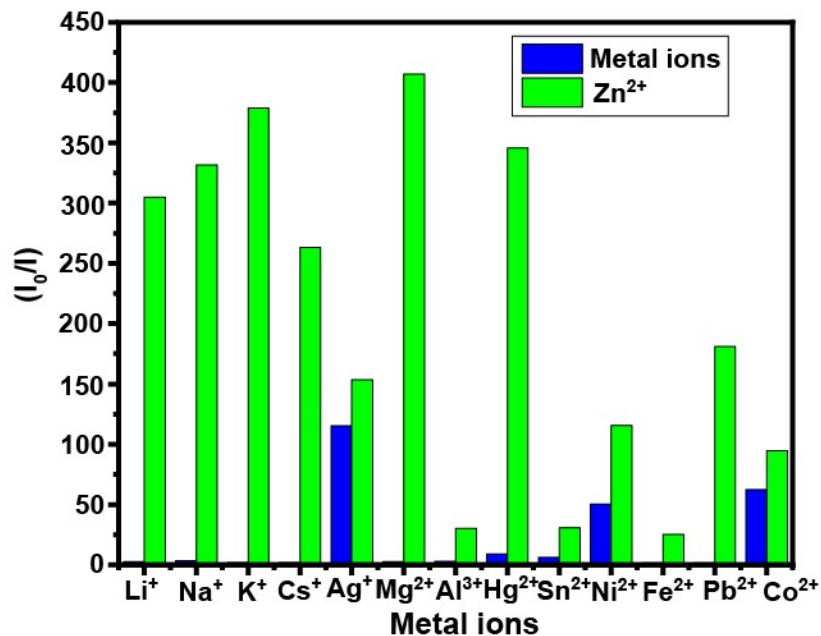

Figure S13: Bar graph of relative changes in the fluorescence emission intensity of  $H_2NAPHISO$  with different ions with respect to  $Zn^{2+}$  ion.

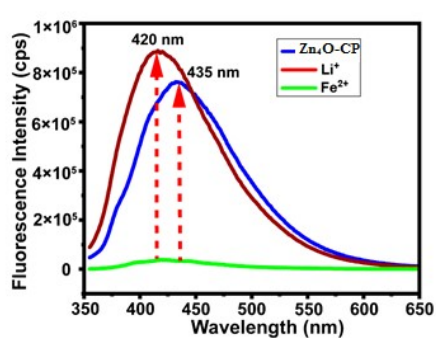

(a)

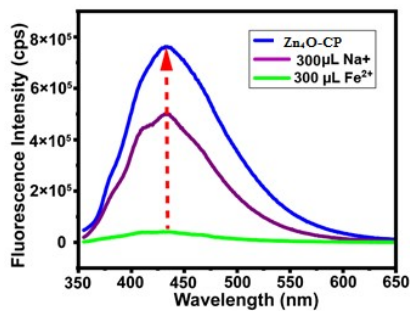

(b)

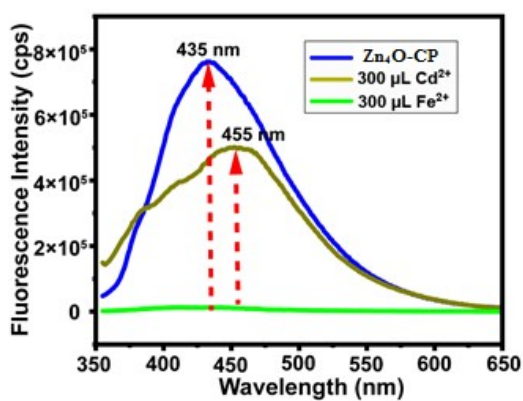

(c)

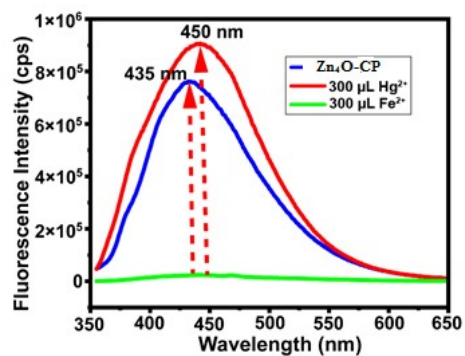

(d)

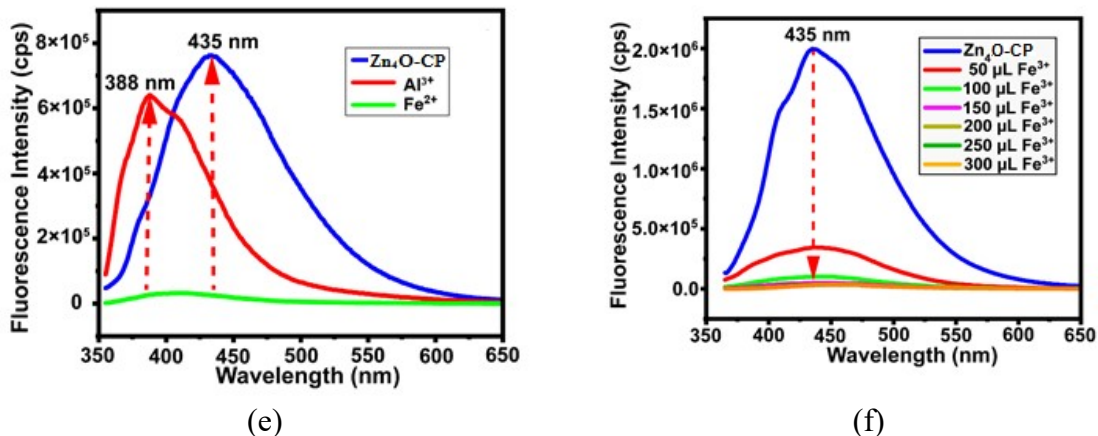

Figure S14: Competitive fluorescence emission spectra of **Zn<sub>4</sub>O-CP** (3mL, 4 mg in 10 mL of DMF with aqueous Fe<sup>2+</sup> (10mM, 400 μL) in the presence of (a) Li<sup>+</sup> (b) Al<sup>3+</sup> (c) Cd<sup>2+</sup> (d) Hg<sup>2+</sup> (e) Na<sup>+</sup> ions. (f) The emission intensity of Zn<sub>4</sub>MOF decreased with the incremental addition of 10 mM aqueous Fe<sup>3+</sup> solution, ranging from 0 μL to 300 μL (λ<sub>ex</sub> = 350 nm, and λ<sub>em</sub> = 435 nm).

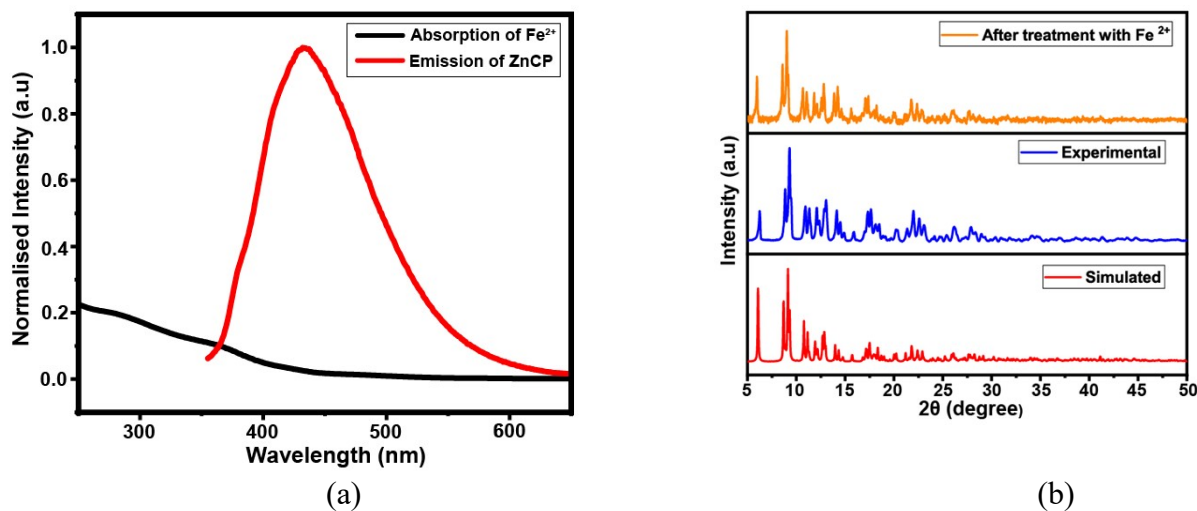

Figure S15: (a) The absorption and emission spectra of **Zn<sub>4</sub>O-CP** in DMF and (b) Comparison of experimental PXRD patterns of the **Zn<sub>4</sub>O-CP** and PXRD of the sample after treatment with Fe<sup>2+</sup>.

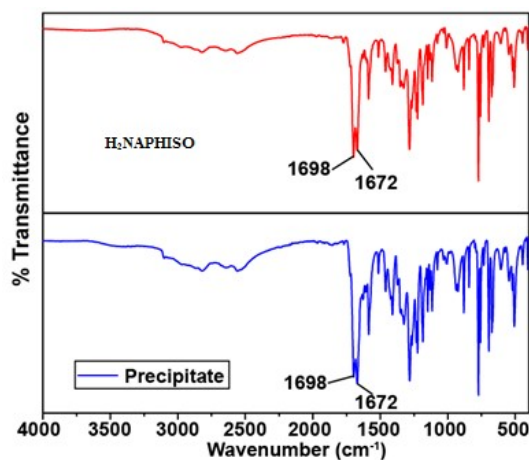

Figure S16: FT-IR spectra of **H<sub>2</sub>NAPHISO** and precipitate obtained after treating it with zinc acetate hexahydrate for 2 hrs in DMF at room temperature.

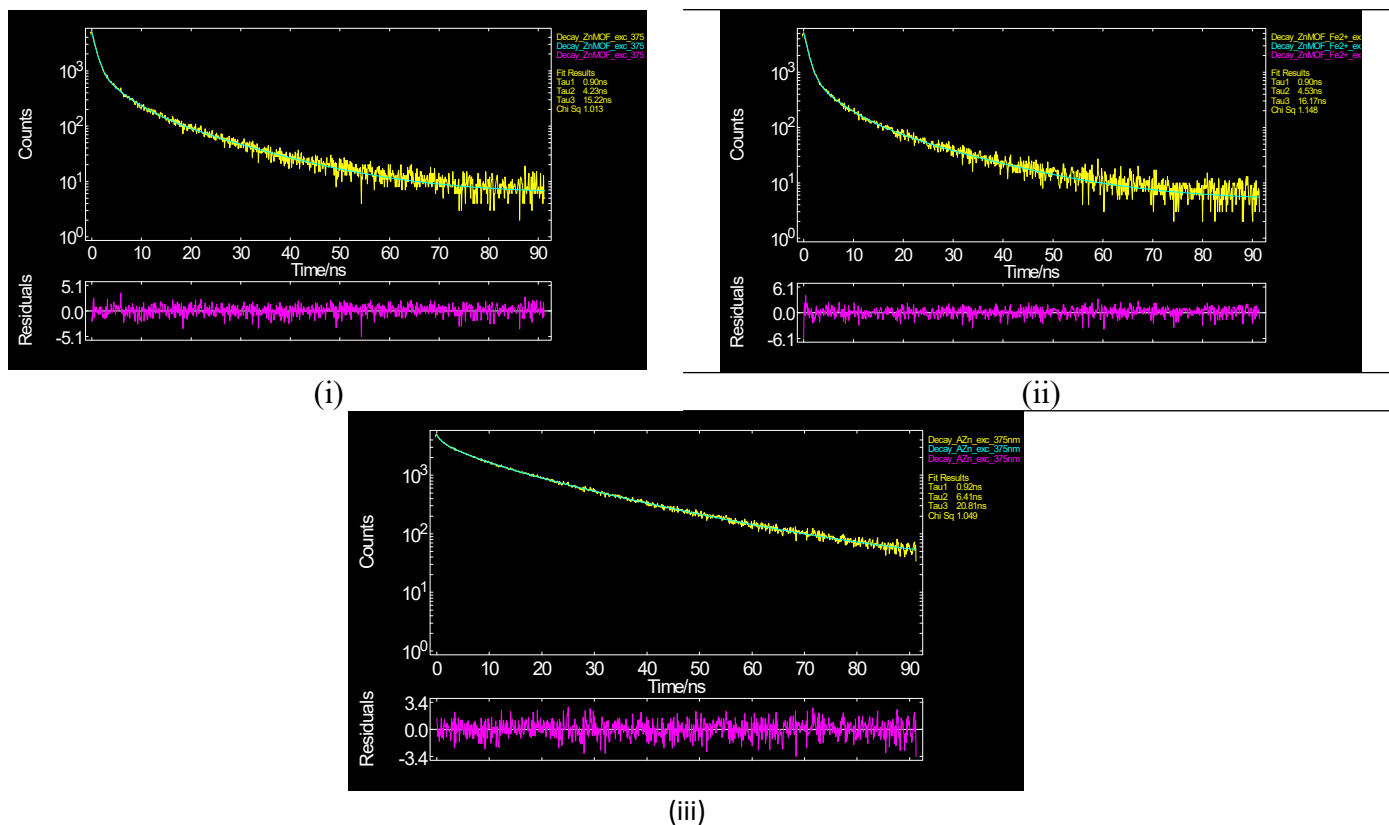

Figure S17: Life-time decay profile of (i)  $\text{Zn}_4\text{O-CP}$  (4 mg in 3 mL DMF dispersed by sonication), (ii) by adding  $\text{Fe}^{2+}$  (200  $\mu\text{L}$  from 10 mM solution in DMF), and (iii)  $\text{H}_2\text{NAPHISO}$  (1mM in 3 mL DMF) with 300  $\mu\text{L}$   $\text{Zn}^{2+}$  (10 mM stock solution in DMF).

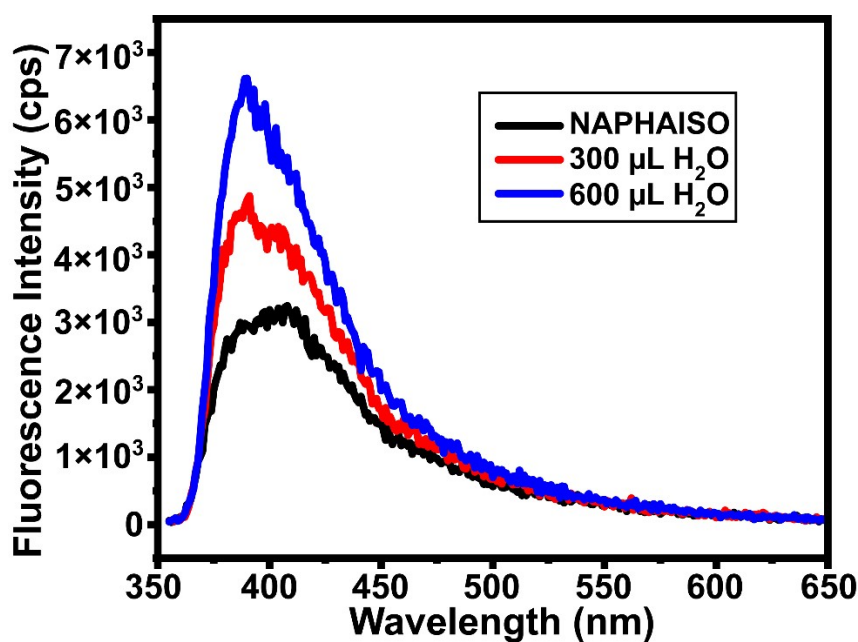

Figure S18: The change in emission spectra of  $\text{H}_2\text{NAPHISO}$  (1 mM in DMF, 2.5 mL) incrementally diluted with water

Table S1: Crystals parameters of the  $\text{Zn}_4\text{O-CP}$

|                   |                                                                |
|-------------------|----------------------------------------------------------------|
| Empirical Formula | $\text{C}_{66}\text{H}_{48}\text{N}_5\text{O}_{24}\text{Zn}_4$ |
| Formula Weight    | 1556.57                                                        |

|                                          |                                              |
|------------------------------------------|----------------------------------------------|
| Space group                              | Triclinic $P\bar{1}$                         |
| a/ Å                                     | 10.3826 (6)                                  |
| b/Å                                      | 16.2352 (10)                                 |
| c/ Å                                     | 21.2335 (14)                                 |
| $\alpha/^\circ$                          | 106.864 (2)                                  |
| $\beta/^\circ$                           | 102.927 (2)                                  |
| $\gamma/^\circ$                          | 102.216 (2)                                  |
| V/ Å <sup>3</sup>                        | 3188.4 (3)                                   |
| Z                                        | 2                                            |
| $\rho_{\text{cal}}$ (gcm <sup>-3</sup> ) | 1.621                                        |
| $\mu$ (mm <sup>-1</sup> )                | 1.575                                        |
| F(000)                                   | 1582                                         |
| Refl Collected                           | 76522                                        |
| Independent Refl                         | 11228                                        |
| Ranges (h, k, l)                         | -12 ≤ h ≤ 12<br>-19 ≤ k ≤ 19<br>-25 ≤ l ≤ 25 |
| Max $\theta$ (degree)                    | 25.0                                         |
| Data/Restraints/Parameter                | 11228/0/869                                  |
| Goof (F <sup>2</sup> )                   | 1.070                                        |
| R indexes                                | 0.0507                                       |
| [I > 2 $\sigma$ ]                        | 0.0729                                       |
| WR <sub>2</sub>                          | 0.1284                                       |

Table S2: Life-time decay data

| Compound                                             | $\tau_1$ (ns)<br>[% fraction] | $\tau_2$ (ns)<br>[% fraction] | $\tau_3$ (ns)<br>[% fraction] | $\langle \tau \rangle$<br>(ns) | $\chi^2$ |
|------------------------------------------------------|-------------------------------|-------------------------------|-------------------------------|--------------------------------|----------|
| <b>Zn<sub>4</sub>O-CP</b>                            | 0.8959<br>[32.72]             | 4.226<br>[30.15]              | 15.22<br>[37.13]              | 7.219                          | 1.0129   |
| <b>Zn<sub>4</sub>O-CP</b> with Fe <sup>2+</sup> ions | 0.8999<br>[39.87]             | 4.533<br>[29.59]              | 16.17<br>[30.54]              | 6.639                          | 1.1482   |
| H <sub>2</sub> NAPHISO with Zn <sup>2+</sup> ions    | 0.9220<br>[2.06]              | 6.407<br>[19.40]              | 20.81<br>[78.54]              | 11.129                         | 1.0485   |

Equation for tri-exponential fit:  $A + B_1 \exp(-t/\tau_1) + B_2 \exp(-t/\tau_2) + B_3 \exp(-t/\tau_3)$

$$\langle \tau \rangle = (B_1 \tau_1^2 + B_2 \tau_2^2 + B_3 \tau_3^2) / (B_1 \tau_1 + B_2 \tau_2 + B_3 \tau_3)$$

Table S3: Comparison on the detection limit of various substrates reported recently for Fe<sup>2+</sup> ions

| Compound/composite                                             | Detection limit | Reference                                                                                                                                                  |
|----------------------------------------------------------------|-----------------|------------------------------------------------------------------------------------------------------------------------------------------------------------|
| Phenanthroline derivative                                      | 2.60 ppb        | H. Nawaz, W. Tian, J. Zhang, R. Jia, Z. Chen, J. Zhang, <i>ACS Appl. Mater. Interfaces</i> . 2018, 10, 2114 - 2121.                                        |
| Eu-MOF                                                         | 2.00 nM         | Y. Cheng, M. Wu, Z. Du, Y. Chen, L. Zhao, Z. Zhu, X. Yu, Y. Yang, C. Zeng, <i>ACS Appl. Mater. Interfaces</i> . 2023, 15, 24570 - 24582.                   |
| 2-((3-Hydroxyphenyl)amino)-3-(phenylthio)naphthalene-1,4-dione | 0.27 $\mu$ M    | P. Ravichandiran, A. Boguszewska-Czubara, M. Maslyk, A. P. Bella, S. A. Subramaniyan, P. M. Johnson, K. S. Shim, H. G. Kim, D. Yoo,                        |
| Polyoxometalate                                                | 8.00 nM         | Y. Xu, P. Li, X. Hu, H. Chen, Y. Tang, Y. Zhu, X. Zhu, Y. Zhang, M. Liu, S. Yao, <i>ACS Appl. Nano Mater.</i> 2021, 4, 8302 - 8313.                        |
| Naphthalimide derivative                                       | 82.00 nM        | T. Yan, X. Wang, C. Liu, X. Cai, Y. Wang, X. Liu, X. Rong, K. Wang, W. Li, W. Sheng, B. Zhu, <i>J. Agricultural and Food Chem.</i> 2024, 72, 13341 - 13347 |
| Carbamoyl oxime                                                |                 |                                                                                                                                                            |
| Naphthalimide derivative                                       | 0.50 $\mu$ M    | W. Xuan, R. Pan, Y. Wei, Y. Cao, H. Li, F.-S. Liang, K.-J. Liu, J. B. Wang,                                                                                |

|                                   |          |                                                                                                                                                                |
|-----------------------------------|----------|----------------------------------------------------------------------------------------------------------------------------------------------------------------|
| S-S derivative                    | 17.54 nM | <i>Bioconjugate Chem.</i> 2016, 27, 302 - 308.                                                                                                                 |
| CdTe quantum dot                  | 5.00 nM  | D. C. Immanuel, N. Bhuvanesh, H. Jayaraj, A. Thamilselvan, D. P. Devi, A. Abiram, J. Prabhu, R. J. A. O. Nandhakumar, <i>ACS Omega</i> . 2020, 5, 3055 - 3072. |
| Salicylyliminedibenzyl derivative | 3.96 ppb | P. Wu, Y. Li, X.-P. J. A. Yan, <i>Anal. Chem.</i> 2009, 81, 6252 - 6257.                                                                                       |
| ZnO <sub>4</sub> -CP              | 42.57 nM | R. Joseph, J. P. Chinta, C. P. Rao, <i>Inorg. Chem.</i> 2011, 50, 7050 - 7058.                                                                                 |
|                                   |          | This work                                                                                                                                                      |
